# Supplementary material for: Impaired Mucosal Homeostasis in Short-Term Fiber Deprivation Is Due to Reduced Mucus Production Rather Than Overgrowth of Mucus-Degrading Bacteria
Source: MDPI journal article supplement (doi:10.3390/nu14183802), 2022-09-15
Supplement: s1 [file s1]

## Supplementary figures

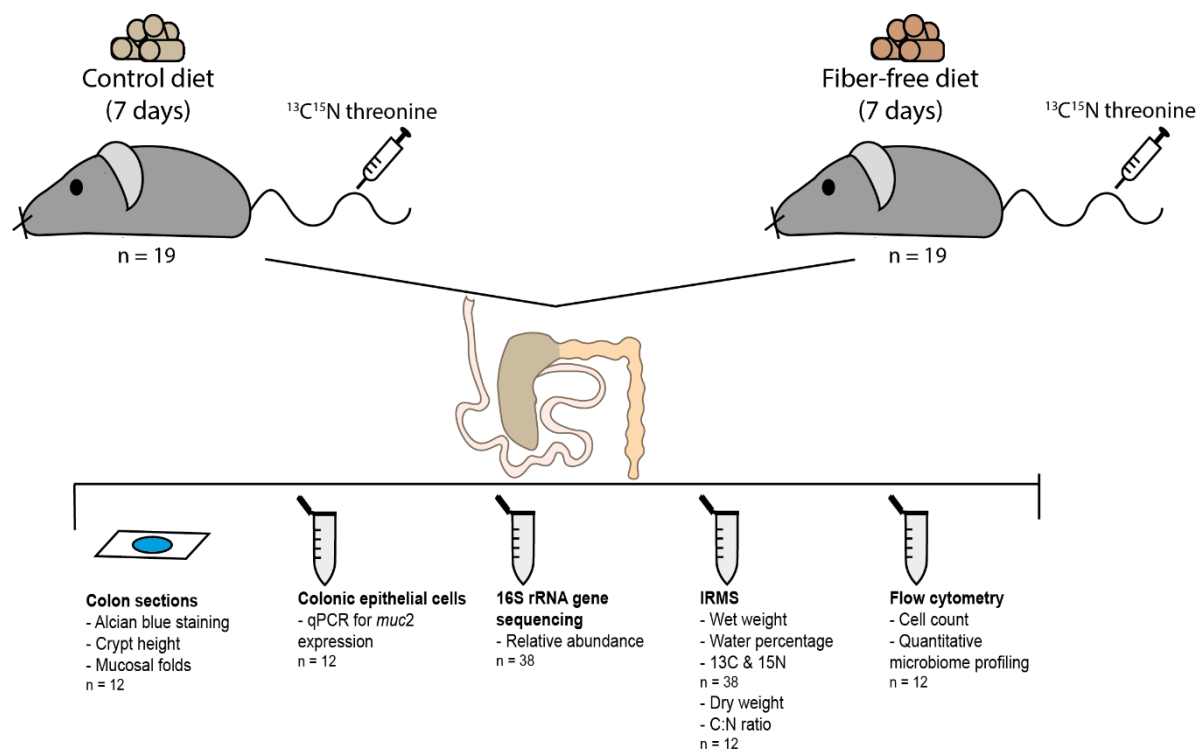

**Supplementary Figure S1:** Experimental set-up of harvested samples. After an initial week of acclimatization on a standard chow or control diet, half the mice were switched to a fiber-free diet. All mice were sacrificed after 7 days of dietary intervention.

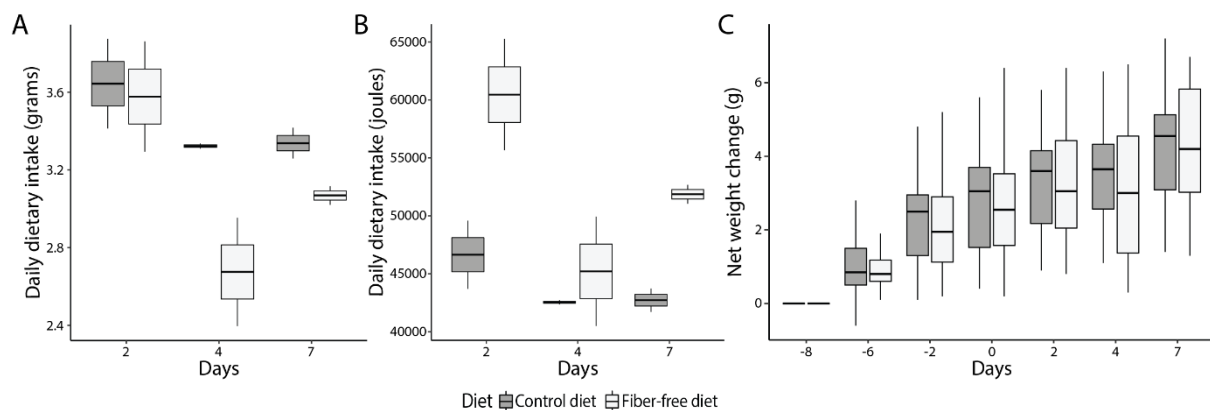

**Supplementary Figure S2:** Daily dietary intake in grams (A) and joules (B) per mouse per day. (C) The net weight change per mouse during the experiment. Day 0 indicates the day the diets were switched. Box plots show the group median and interquartile range. Dark grey indicates the control diet, light grey the fiber-free diet.

**Supplementary Table S1: Nutritional composition of the diets**

|                                     | <b>Control chow diet (CD)</b> | <b>Fiber Free diet (FFD)</b> |
|-------------------------------------|-------------------------------|------------------------------|
| <b>Crude protein (%)</b>            | 19                            | 18.5                         |
| <b>Crude fat (%)</b>                | 3.3                           | 7.1                          |
| <b>Crude fiber (cellulose) (%)</b>  | 5 (16.9 = NDF, 7.1 = ADF)     | -                            |
| <b>Crude ash (%)</b>                | 6.4                           | 5.3                          |
| <b>Starch (%)</b>                   | 35.9                          | -                            |
| <b>Sugar (Dextrose/glucose) (%)</b> | 5.4                           | 65.1                         |
|                                     |                               |                              |
| <b>Metabolisable Energy (MJ/kg)</b> | <b>13.5</b>                   | <b>16.9</b>                  |
| Protein, kcal %                     | 33                            | 18.3                         |
| Fat, kcal %                         | 9                             | 15.8                         |
| Carbohydrates, kcal %               | 58                            | 65.8                         |
